# Supplementary material
Source: publisher figshare collection journal article supplement (https://acs.figshare.com/ndownloader/files/4636879)
Supplement: Supplementary file 1 [file 4636879]

**Supporting Information**  
**for**

**The Photophysical Behavior of Open-shell First-row  
Transition Metal Octabutoxynaphthalocyanines: CoNc(Obu)<sub>8</sub>  
and CuNc(Obu)<sub>8</sub> as a Case Study**

Alexandra V. Soldatova, Junhwan Kim, Angela Rosa,<sup>\*</sup> Giampaolo Ricciardi,<sup>\*</sup>  
Malcolm E. Kenney,<sup>\*</sup> and Michael A. J. Rodgers<sup>\*</sup>

**Table S1.** Selected Geometrical Parameters ( $\text{\AA}$ , deg) Calculated for the Ground State ( $1^2B_2$ ) and the  $1^2A_2$  and  $1^2B_1$  Excited States of  $\text{CuNc(OMe)}_8$ .

| Parameter                                                                                                                        | GS    | $1^2A_2^a$ | $1^2B_1^a$ |
|----------------------------------------------------------------------------------------------------------------------------------|-------|------------|------------|
| Cu-N <sub>p</sub>                                                                                                                | 1.964 | 2.011      | 2.005      |
| C <sub><math>\alpha</math></sub> -N <sub>p</sub>                                                                                 | 1.374 | 1.365      | 1.363      |
| C <sub><math>\alpha</math></sub> -C <sub><math>\beta</math></sub>                                                                | 1.458 | 1.466      | 1.468      |
| C <sub><math>\beta</math></sub> -C <sub><math>\gamma</math></sub>                                                                | 1.436 | 1.438      | 1.433      |
| C <sub>o</sub> -O                                                                                                                | 1.368 | 1.365      | 1.363      |
| C <sub><math>\alpha</math></sub> -N <sub>b</sub>                                                                                 | 1.327 | 1.334      | 1.335      |
| C <sub><math>\alpha</math></sub> -N <sub>p</sub> -C <sub><math>\alpha</math></sub>                                               | 109.3 | 109.7      | 110.1      |
| C <sub><math>\alpha</math></sub> -N <sub>b</sub> -C <sub><math>\alpha</math></sub>                                               | 124.1 | 125.0      | 124.9      |
| O $\cdots$ O                                                                                                                     | 3.911 | 3.973      | 4.010      |
| C <sub>Me</sub> -O-C <sub>o</sub> -C <sub><math>\beta</math></sub>                                                               | 63.0  | 61.1       | 58.5       |
| (C <sub><math>\alpha</math></sub> -N <sub>p</sub> -N <sub>p</sub> -C <sub><math>\alpha</math></sub> ) <sub>ad</sub> <sup>b</sup> | 11.3  | 16.9       | 15.3       |

<sup>a</sup>geometry optimizations of the excited states were performed under the  $D_{2d}$  symmetry constraint; <sup>b</sup>dihedral angle between adjacent pyrrole ring planes.

**Table S2.** Selected Geometrical Parameters ( $\text{\AA}$ , deg)  
Calculated for the Ground State ( $1^2A_1$ ) and the  $1^2B_1$   
Excited State of  $\text{CoNc(OMe)}_8$ .

| Parameter                                                                                                                        | GS    | $1^2B_1^a$  |
|----------------------------------------------------------------------------------------------------------------------------------|-------|-------------|
| Co–N <sub>p</sub>                                                                                                                | 1.920 | 1.911/1.912 |
| C <sub><math>\alpha</math></sub> –N <sub>p</sub>                                                                                 | 1.381 | 1.385/1.382 |
| C <sub><math>\alpha</math></sub> –C <sub><math>\textcircled{R}</math></sub>                                                      | 1.453 | 1.450/1.453 |
| C <sub><math>\textcircled{R}</math></sub> –C <sub><math>\textcircled{R}</math></sub>                                             | 1.432 | 1.433/1.431 |
| C <sub>o</sub> –O                                                                                                                | 1.368 | 1.368/1.367 |
| C <sub><math>\alpha</math></sub> –N <sub>b</sub>                                                                                 | 1.322 | 1.321/1.322 |
| C <sub><math>\alpha</math></sub> –N <sub>p</sub> –C <sub><math>\alpha</math></sub>                                               | 107.9 | 107.7/107.5 |
| C <sub><math>\alpha</math></sub> –N <sub>b</sub> –C <sub><math>\alpha</math></sub>                                               | 122.8 | 122.5       |
| O $\cdots$ O                                                                                                                     | 3.880 | 3.877       |
| C <sub>Me</sub> –O–C <sub>o</sub> –C <sub><math>\beta</math></sub>                                                               | 63.1  | 63.7/62.4   |
| (C <sub><math>\alpha</math></sub> –N <sub>p</sub> –N <sub>p</sub> –C <sub><math>\alpha</math></sub> ) <sub>ad</sub> <sup>b</sup> | 11.2  | 11.2        |

<sup>a</sup>Jahn–Teller distorted  $C_{2v}$  structure; <sup>b</sup>dihedral angle  
between adjacent pyrrole ring planes.
